# Supplementary material
Source: PubMed Central journal article supplement (PMC5559415)
Supplement: rsta20160319supp1.pdf [file rsta20160319supp1.pdf]

## **Depth Perception: The Need to Report Ocean Biogeochemical Rates as Functions of Temperature, not Depth**

All data for this paper comes from previously published reports except as noted in the text. The data for each figure are listed here for the convenience of the reader

| Depth | Temp   | 1/T      | AOU     | AOUR       | ln(AOUR) |
|-------|--------|----------|---------|------------|----------|
| m     | °C     | 1/K      | umol/kg | umol/kg-yr | mol/kg-s |
| 140   | 19.330 | 0.003419 | 13.51   | 8.91       | -28.896  |
| 200   | 18.825 | 0.003425 | 20.31   | 10.04      | -28.776  |
| 250   | 18.528 | 0.003428 | 24.49   | 8.74       | -28.915  |
| 300   | 18.262 | 0.003432 | 26.60   | 8.22       | -28.976  |
| 400   | 17.665 | 0.003439 | 36.75   | 7.70       | -29.042  |
| 500   | 16.401 | 0.003454 | 54.22   | 6.54       | -29.205  |
| 600   | 14.936 | 0.003471 | 66.25   | 5.48       | -29.382  |
| 700   | 12.741 | 0.003498 | 94.84   | 4.31       | -29.622  |
| 800   | 10.156 | 0.003530 | 120.02  | 3.08       | -29.958  |
| 900   | 8.197  | 0.003554 | 122.53  | 2.15       | -30.317  |
| 1000  | 6.641  | 0.003574 | 102.32  | 2.04       | -30.370  |

**Supplementary Table 1:** Data for Figure 1: Sargasso Sea Arrhenius activation energy and Eyring / Gibbs Free Energy of activation equation plots. Original data from Stanley et al. [2].

| SigTh     | Depth    | Temp  | Temp   | OUR(grad)  | AOUR       | ln(AOUR) |
|-----------|----------|-------|--------|------------|------------|----------|
| g/L       | m        | degC  | K      | umol/kg-yr | mol/kg-sec |          |
| 25.0-25.5 | 164 ± 42 | 18.50 | 291.65 | 10.8       | 3.4224E-13 | -28.703  |
| 25.5-26.0 | 214 ± 56 | 14.60 | 287.75 | 8.3        | 2.6302E-13 | -28.967  |
| 26.0-26.2 | 281 ± 54 | 12.00 | 285.15 | 3.6        | 1.1408E-13 | -29.802  |
| 26.2-26.4 | 353 ± 43 | 9.96  | 283.11 | 4.3        | 1.3626E-13 | -29.624  |
| 26.4-26.6 | 435 ± 34 | 8.13  | 281.28 | 3.3        | 1.0457E-13 | -29.889  |
| 26.6-26.8 | 507 ± 53 | 6.68  | 279.83 | 3.1        | 9.8235E-14 | -29.951  |
| 26.8-27.0 | 598 ± 61 | 5.98  | 279.13 | 0.12       | 3.8027E-15 | -33.203  |

**Supplementary Table 2:** Data for Figure 2A: Northeast Pacific along 152W Arrhenius activation energy Eyring / Gibbs Free Energy of activation equation plots. Data is from Table 2 in Sonnerup et al [22].

| Depth<br>m | Temp<br>degC | Temp<br>K | Gradient calculations   |                    |          | Path calculations       |                    |          |
|------------|--------------|-----------|-------------------------|--------------------|----------|-------------------------|--------------------|----------|
|            |              |           | OUR(grad)<br>umol/kg-yr | AOUR<br>mol/kg-sec | ln(AOUR) | OUR(path)<br>umol/kg-yr | AOUR<br>mol/kg-sec | ln(AOUR) |
| 150        | 19.41        | 292.56    | 11.5                    | 3.6442E-13         | -28.640  | 13.8                    | 4.3730E-13         | -28.458  |
| 200        | 16.54        | 289.69    | 6.5                     | 2.0598E-13         | -29.211  | 23.0                    | 7.2884E-13         | -27.947  |
| 250        | 14.06        | 287.21    |                         |                    |          | 17.0                    | 5.3871E-13         | -28.250  |
| 300        | 10.71        | 283.86    |                         |                    |          | 13.0                    | 4.1195E-13         | -28.518  |
| 350        | 9.17         | 282.32    | 4.5                     | 1.4260E-13         | -29.579  | 8.0                     | 2.5351E-13         | -29.003  |
| 400        | 7.90         | 281.05    | 6.5                     | 2.0598E-13         | -29.211  | 6.5                     | 2.0598E-13         | -29.211  |
| 450        | 6.88         | 280.03    | 3.5                     | 1.1091E-13         | -29.830  | 4.0                     | 1.2676E-13         | -29.697  |
| 500        | 6.57         | 279.72    | 3.0                     | 9.5066E-14         | -29.984  | 3.0                     | 9.5066E-14         | -29.984  |
| 600        | 5.84         | 278.99    | 0.2                     | 6.3378E-15         | -32.692  | 0.2                     | 6.3378E-15         | -32.692  |

**Supplementary Table 3:** Data for Figures 2B and 2C: Northeast Pacific 20N 152W Arrhenius activation energy and Eyring / Gibbs Free Energy of activation equation plots. Data is from Figure 9 (gradient calculation, for Figure 2B; path calculation, for Figure 2C) in Sonnerup et al. [22]

| SigTh<br>g/L | Latitude<br>Band | WOCE<br>Mid-pt Stn | Depth<br>m | Temp<br>degC | Temp<br>K | OUR(grad)<br>umol/kg-yr | AOUR<br>mol/kg-sec | ln(AOUR) |
|--------------|------------------|--------------------|------------|--------------|-----------|-------------------------|--------------------|----------|
| 25.5-26.0    | 30-37S           | 72                 | 175        | 14.80        | 287.95    | 6.4                     | 2.0281E-13         | -29.227  |
| 26.0-26.5    | 30-40S           | 69                 | 220        | 10.96        | 284.11    | 3.1                     | 9.8235E-14         | -29.951  |
| 26.5-26.8    | 30-42S           | 67                 | 275        | 7.74         | 280.89    | 2.7                     | 8.5560E-14         | -30.090  |
| 26.8-26.9    | 30-42S           | 67                 | 340        | 7.20         | 280.35    | 2.3                     | 7.2884E-14         | -30.250  |
| 26.9-27.0    | 30-42S           | 67                 | 440        | 6.44         | 279.59    | 1.7                     | 5.3871E-14         | -30.552  |
| 27.0-27.1    | 30-42S           | 67                 | 690        | 5.45         | 278.60    | 1.3                     | 4.1195E-14         | -30.820  |
| 27.1-27.2    | 30-42S           | 67                 | 895        | 4.65         | 277.80    | 0.8                     | 2.5351E-14         | -31.306  |

**Supplementary Table 4:** Data for Figure 3A: Southeast Pacific 32° to 42° S Arrhenius activation energy and Eyring / Gibbs Free Energy of activation equation plots. Data from Sonnerup et al. [24].

| SigTh<br>g/L | Latitude<br>Band | WOCE<br>Mid-pt Stn | Depth<br>m | Temp<br>degC | Temp<br>K | OUR(grad)<br>umol/kg-yr | AOUR<br>mol/kg-sec | ln(AOUR) |
|--------------|------------------|--------------------|------------|--------------|-----------|-------------------------|--------------------|----------|
| 26.5-26.8    | 43-47S           | 49                 | 155        | 8.42         | 281.57    | 16.6                    | 5.2603E-13         | -28.273  |
| 26.8-26.9    | 43-50S           | 46                 | 210        | 6.85         | 280.00    | 4.3                     | 1.3626E-13         | -29.624  |
| 26.9-27.0    | 43-50S           | 46                 | 410        | 6.36         | 279.51    | 1.0                     | 3.1689E-14         | -31.083  |
| 27.0-27.1    | 43-54S           | 42                 | 665        | 5.53         | 278.68    | 0.8                     | 2.5351E-14         | -31.306  |
| 27.1-27.2    | 43-54S           | 42                 | 850        | 4.74         | 277.89    | 0.01                    | 3.1689E-16         | -35.688  |

**Supplementary Table 5:** Data for Figure 3B: Southeast Pacific 43° to 54° S Arrhenius activation energy and Eyring / Gibbs Free Energy of activation equation plots. Data from Sonnerup et al. [24].

| Depth | Lat | Temperature °C |        |        |        |        |        | Temp   |       | OUR        |
|-------|-----|----------------|--------|--------|--------|--------|--------|--------|-------|------------|
|       |     | 36.500         |        |        | 37.500 |        |        | °C     |       |            |
| m     | Lon | 16.500         | 17.500 | 18.500 | 16.500 | 17.500 | 18.500 | Mean   | Stdev | μmol/kg-yr |
| 125   |     | 15.087         | 15.158 | 15.235 | 14.727 | 14.876 | 15.001 | 15.014 | 0.188 | 14.39      |
| 150   |     | 14.889         | 14.961 | 15.039 | 14.582 | 14.717 | 14.834 | 14.837 | 0.166 | 10.09      |
| 200   |     | 14.604         | 14.692 | 14.762 | 14.309 | 14.516 | 14.607 | 14.582 | 0.158 | 5.81       |
| 250   |     | 14.520         | 14.608 | 14.681 | 14.272 | 14.470 | 14.558 | 14.518 | 0.141 | 3.83       |
| 300   |     | 14.404         | 14.487 | 14.556 | 14.193 | 14.376 | 14.455 | 14.412 | 0.125 | 2.75       |
| 400   |     | 14.253         | 14.301 | 14.350 | 14.065 | 14.221 | 14.287 | 14.246 | 0.099 | 1.69       |
| 500   |     | 14.134         | 14.151 | 14.168 | 13.931 | 14.067 | 14.106 | 14.093 | 0.087 | 1.19       |
| 600   |     | 13.981         | 13.978 | 13.969 | 13.820 | 13.921 | 13.937 | 13.934 | 0.061 | 0.92       |
| 700   |     | 13.854         | 13.869 | 13.873 | 13.876 | 13.863 | 13.859 | 13.866 | 0.008 | 0.76       |
| 800   |     | 13.676         | 13.712 | 13.728 | 13.662 | 13.702 | 13.719 | 13.700 | 0.026 | 0.65       |
| 900   |     | 13.621         | 13.656 | 13.671 | 13.648 | 13.660 | 13.671 | 13.655 | 0.019 | 0.58       |
| 1000  |     | 13.558         | 13.590 | 13.602 | 13.575 | 13.595 | 13.605 | 13.588 | 0.018 | 0.53       |

**Supplementary Table 6:** Data for Figure 4: Eastern Mediterranean Sea Arrhenius activation energy and Eyring / Gibbs Free Energy of activation equation plots. Data from Roether & Well [25].

| Station | Depth | OUR   | OUR        | Temp | Temp  |
|---------|-------|-------|------------|------|-------|
|         | m     | mm    | μmol/kg-yr | mm   | Deg C |
| 3       | 100   | 36.9  | 10.92      | 12.0 | 20.99 |
| 3       | 150   | 27.8  | 8.22       | 32.2 | 22.66 |
| 3       | 300   | 26.9  | 7.96       | 18.0 | 21.49 |
| 67      | 100   | 61.5  | 18.20      | 55.1 | 24.55 |
| 67      | 200   | 31.6  | 9.35       | 24.4 | 22.01 |
| 67      | 300   | 31.0  | 9.17       | 19.4 | 21.60 |
| 157     | 100   | 73.8  | 21.83      | 42.8 | 23.53 |
| 157     | 200   | 26.5  | 7.84       | 24.9 | 22.05 |
| 157     | 300   | 26.9  | 7.96       | 19.6 | 21.62 |
| 192     | 100   | 97.4  | 28.82      | 44.9 | 23.71 |
| 192     | 200   | 41.9  | 12.40      | 27.8 | 22.29 |
| 192     | 300   | 27.0  | 7.99       | 20.4 | 21.68 |
| 205     | 100   | 104.2 | 30.83      | 51.0 | 24.21 |
| 205     | 200   | 105.0 | 31.07      | 24.0 | 21.98 |
| 205     | 300   | 31.4  | 9.29       | 19.0 | 21.57 |

**Supplementary Table 7:** Red Sea data for Figure 5: All qualified data sets as indicated in the text plotted as an Arrhenius function. For Figure 5 we included all data from all of the previous tables plus this data set from the Red Sea which was not plotted previously. This data is from Zhai et al. [26]. Please note, this data was interpolated from various plots "by hand" from figures for stations 3, 67, 157, 192 & 205. After measuring the offset distances from the axes for each point the distances were converted to the proper units by dividing by the full length of each axis times the data range.

## References

Please see the text of the manuscript for the complete citations for the references.
